# Supplementary material
Source: PubMed Central journal article supplement (PMC5459611)
Supplement: NIHMS855777-supplement-supplement_1.pdf [file NIHMS855777-supplement-supplement_1.pdf]

## **SUPPLEMENTAL MATERIAL**

**Supplemental Table. Causal Mediation Analysis\***

| <b>Effect (of female sex on MACE)</b> | <b>Estimate</b> | <b>95% CI</b> |
|---------------------------------------|-----------------|---------------|
| cde                                   | 2.01            | (0.73-4.27)   |
| nde                                   | 1.96            | (0.75-4.21)   |
| nie                                   | 1.33            | (1.02-2.04)   |
| Total effect                          | 2.56            | (1.04-5.56)   |
| <b>Proportion mediated (by CFR)</b>   | <b>0.40</b>     | -             |

\*as described with survival data<sup>1</sup>

MACE denotes major adverse cardiovascular events; CI, confidence interval; cde, controlled direct effect; nde, natural direct effect; nie, natural indirect effect; CFR, coronary flow reserve

## Supplemental Reference

1. Valeri L, VanderWeele TJ. Sas macro for causal mediation analysis with survival data. *Epidemiology*. 2015;26:e23-24
